# Supplementary material
Source: PubMed Central journal article supplement (PMC5766380)
Supplement: NIHMS919387-supplement.pdf [file NIHMS919387-supplement.pdf]

wt 690 gcagctgacacaggaacaaacagccaggtcagccaaaattaccctatagtgagaaacctccaggggcaaa  
A1 690 gccgcccgataccggaataattcacaagtgtcacagaactatccaatcgtccagaatctgcaaggccaga

wt 760 tggtaacatcagggccatcacctagaactttaaatgcatgggtaaaagtagtagaagagaaggctttcag  
A1 760 tggccaccaagcaatcagcccaggaccctcaacgcctgggtcaaggtggtggaggaaaaggccttttc

wt 830 ccagagaagtaataaccatggtttcagcattatcagaaggagc  
A1 830 accagaggtgatcccaatggttcagcgcctcagcggggcgc

wt 2015 ggtacagttatagtaggacctacacctgtcaacataattggaagaaatctgttgactcag  
A2 2015 gccaccgtgctcgtcggcccaactccagtgaaatcatcggccggaaacctctgacccaa

wt 2075 attggctgcactttaaattttcccatagtcctattgagactgtacc  
A2 2075 atcgggtgcaccctgaacttcccgatctctccaattgagacagtccc

wt 3753 gtgctggaatcaggaaaagtactattttagatggaatagat aaggcccaagaagaacatgagaaatca  
A3 3753 ctgcaggaatacgcaggactgtttctagacggcatcgacaaggcgcgaagaggaacacgagaaatcca

wt 3823 cagtaattggagagcaatggctagtgat tttaacctaccacctgtagttagcaaaagaatagtagccagc  
A3 3823 ttcaaacctggagagctatggcctccgacttcaacctccgcctgtcgttgccaaggagatcgtagcatcc

wt 3893 tgtgataaatgtcagctaaaagggaagccatgcatggacaagttagactgtagcccaggaatattggcagc  
A3 3893 tgcgacaatgccaactaaagggaagcagatgcaaggacaggttgactgttcccaggaatctggcaac

wt 3963 tagattgtacacattagaaggaaaagtattcttggtagcagttc  
A3 3963 tagattgtactcacttagaaggcaaggttataattagtagcagttcc

wt 1177 gcattctggacataagacaaggaccaaaggaacccttagagactatgttagaccgattctataaaactct  
B1 1177 caataactcgatataagacaaggacctaaaggaaccattccgcgactacgtcgaccgattttataaaactt

wt 1247 aagagccgagcaagcttca caagaggtaaaaaat tggatgacagaaaccttgttggtaaaaaatgc  
B1 1247 aagagcagaacaagcgagccaagaggtcaagaaactggatgactgagacgctcctggtaaaaaatgc

wt 8687 ggctacttccctgattggcagaactacacaccagggccaggggtcagatatccactgacc  
B2 8687 ggatattttccgattggcaaaactacaccctgggcccagggctgcgatatccattgacc

wt 8747 tttggatggtgctacaagctagtaccagttgagccagataaggtagaagagggc  
B2 8747 ttcggatggtgctataaaactagtcaccagttgaacctgataaagtagaggaagca

**Supplemental Figure 1.** Nucleotide sequence alignments of NL4-3 (wt) and mutants containing synonymous mutations. Sequence identities are marked by grey highlight.

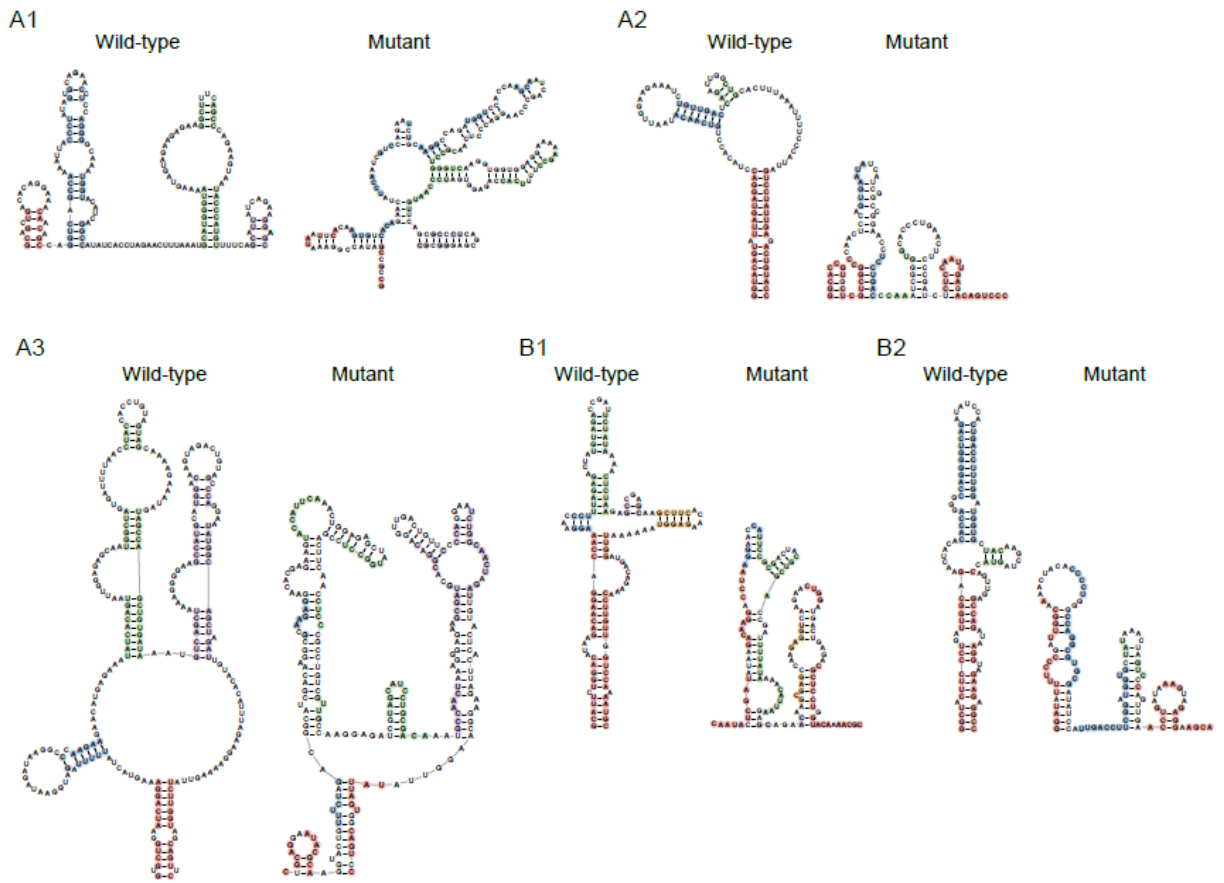

**Supplemental Fig. 2.** Comparison of the NL4-3 structures (wild-type) and the predicted mutant RNA structures. To illustrate the change of RNA structures, elements in the NL4-3 structures are color-coded and the corresponding mutated sequences are coded in the same colors.

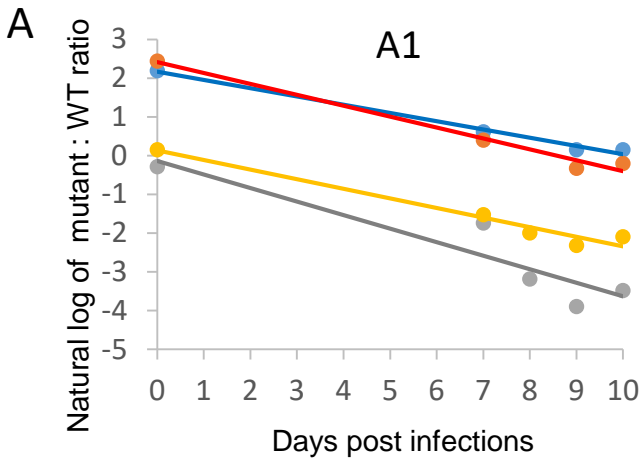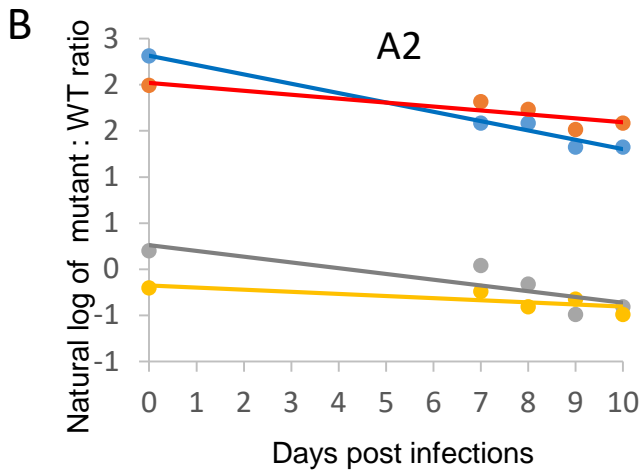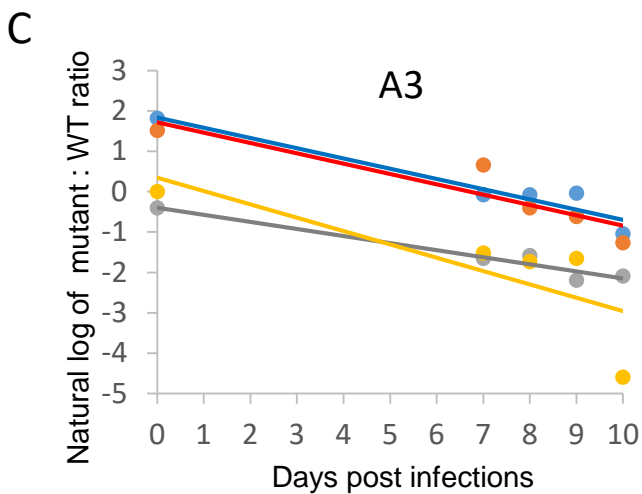

**Supplemental Fig. 3.** The natural log of the mutant to WT virus ratios were plotted over times and the slope the fitted linear line represents the absolute replication differences of each mutant compared to WT virus. Red, blue, gold and grey lines correspond to Experiment 1A, 2A, 1B, and 2B listed in supplemental Table 1, respectively.

**Supplemental Table 1.** Mutant and wild-type (NL4-3) virus ratios from various time points of the competition assay. These results were summarized in the CEM portion of Fig. 4B, 4C, and 4D.

|              |         | Proportion of mutant virus detected (%) |       |       |       |        |       |
|--------------|---------|-----------------------------------------|-------|-------|-------|--------|-------|
| Experiments* |         | Day 0                                   | Day 7 | Day 8 | Day 9 | Day 10 | rs    |
| A1           | Exp. 1A | 90                                      | 65    | 57    | 54    | 54     | -0.28 |
|              | Exp. 2A | 92                                      | 60    | 50    | 42    | 45     | -0.25 |
|              | Exp. 1B | 43                                      | 15    | 4     | 2     | 3      | -0.22 |
|              | Exp. 2B | 54                                      | 18    | 12    | 9     | 11     | -0.35 |
| A2           | Exp. 1A | 91                                      | 83    | 83    | 79    | 79     | -0.1  |
|              | Exp. 2A | 88                                      | 86    | 85    | 82    | 83     | -0.04 |
|              | Exp. 1B | 55                                      | 51    | 46    | 38    | 40     | -0.06 |
|              | Exp. 2B | 45                                      | 44    | 40    | 42    | 38     | -0.02 |
| A3           | Exp. 1A | 86                                      | 48    | 48    | 49    | 26     | -0.25 |
|              | Exp. 2A | 82                                      | 66    | 40    | 35    | 22     | -0.26 |
|              | Exp. 1B | 40                                      | 16    | 17    | 10    | 11     | -0.33 |
|              | Exp. 2B | 50                                      | 18    | 15    | 16    | 1      | -0.18 |

\* Mutant virus : wild-type virus ratios are 9:1 and 1:1 in A and B series, respectively.
